# Supplementary material
Source: publisher figshare collection journal article supplement (https://adisjournals.figshare.com/articles/dataset/_/12619259)
Supplement: Supplementary file 1 [file 3]

# Reduction of COPD exacerbations with tiotropium/olodaterol: pooled analysis of TONADO®/DYNAGITO®

## TONADO® 1+2

Phase III, randomised, double-blind trials in patients with and without a history of exacerbations (52 weeks)

## DYNAGITO®

Phase III, randomised, double-blind trial in patients with a history of exacerbations (52 weeks)

### Post hoc analysis of

9,942

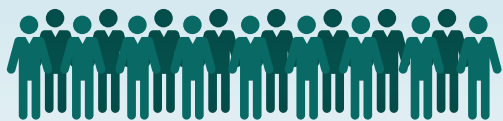

patients with moderate-to-very severe COPD

Patients received T/O 5/5 µg or tio 5 µg

## T/O significantly reduces moderate/severe exacerbations vs tio across a range of patient subgroups

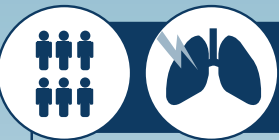

In all patients and in patients with different exacerbation histories

### Moderate/severe exacerbations

All patients<sup>b</sup>

0 to 1 moderate exacerbation<sup>c</sup>

≥2 moderate or ≥1 severe exacerbation<sup>c</sup>

### Exacerbations leading to hospitalisation

All patients<sup>b</sup>

0 to 1 moderate exacerbation<sup>c</sup>

≥2 moderate or ≥1 severe exacerbation<sup>c</sup>

<sup>a</sup>P<0.05

<sup>b</sup>Includes patients with missing exacerbation history

<sup>c</sup>In previous year

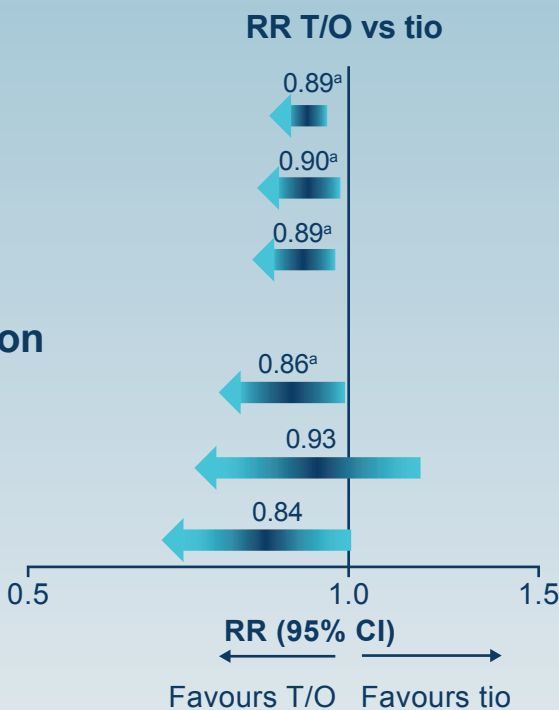

Similar adverse event profiles were noted between the two treatment arms [1]

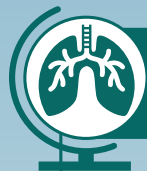

GOLD 2–4

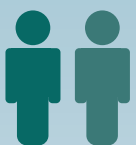

**GOLD 2: 0.49 vs 0.60<sup>a</sup>**  
moderate/severe exacerbations per patient-year (T/O vs tio)  
RR 0.82 (95% CI 0.73, 0.92)

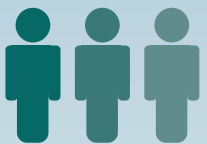

**GOLD 3: 0.76 vs 0.84<sup>a</sup>**  
moderate/severe exacerbations per patient-year (T/O vs tio)  
RR 0.90 (95% CI 0.82, 0.98)

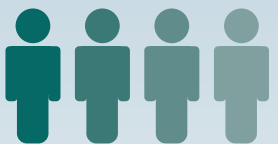

**GOLD 4: 1.14 vs 1.12**  
moderate/severe exacerbations per patient-year (T/O vs tio)  
RR 1.01 (95% CI 0.88, 1.17)

<sup>a</sup>P<0.05

Patients continued on ICS if they were on ICS at baseline

**Conclusion:** this large, pooled, post hoc analysis, reflecting the broad range of patients seen in clinical practice, demonstrated that dual bronchodilation with T/O decreases moderate/severe exacerbations compared with tio monotherapy, without compromising patient safety

CI, confidence interval; COPD, chronic obstructive pulmonary disease; GOLD, Global Initiative for Chronic Obstructive Lung Disease; ICS, inhaled corticosteroids; RR, rate ratio; T/O, tiotropium/olodaterol; tio, tiotropium

1. Ferguson GT, Buhl R, Bothner U, et al. Safety of tiotropium/olodaterol in chronic obstructive pulmonary disease: pooled analysis of three large, 52-week, randomized clinical trials. *Respir Med*. 2018; 143:67–73

This graphical abstract represents the opinions of the authors. For a full list of declarations, including funding and author disclosure statements, please see the full text online. ©The authors, CC-BY-NC 2020.

PEER-REVIEWED  
INFOGRAPHIC

OPEN  
ACCESS

Adis
